# Supplementary material for: A biphasic oxidation of alcohols to aldehydes and ketones using a simplified packed-bed microreactor
Source: publisher site journal article supplement (doi:10.3762/bjoc.5.17), 2009-04-29

# **A biphasic oxidation of alcohols to aldehydes and ketones using a simplified packed-bed microreactor**

Andrew Bogdan<sup>1</sup> and D. Tyler McQuade<sup>2,\*</sup>

Address: <sup>1</sup>Department of Chemistry and Chemical Biology, Cornell University, Ithaca, NY, 14853 USA and <sup>2</sup>Department of Chemistry and Biochemistry, Florida State University, Tallahassee, FL 32306 USA. Fax (850) 644-8281

Email: D. Tyler McQuade\* - [mcquade@chem.fsu.edu](mailto:mcquade@chem.fsu.edu)

\* Corresponding author

**Supplementary Information**

**General:** Solvents were purified by standard procedures. All other reagents were used as received, unless otherwise noted. Sodium hypochlorite solution (reagent grade, available chlorine 10–15%) was purchased from Aldrich and titrated before use.  $^1\text{H}$  NMR and  $^{13}\text{C}$  NMR spectra were recorded in  $\text{CDCl}_3$  on Varian Mercury 300 MHz operating at 300.070 MHz and 75.452 MHz, respectively, using the residual solvent peak as reference. ATR-IR was performed on a Nicolet Avatar DTGS 370 infrared spectrometer with Avatar OMNI sampler and OMNIC software. Elemental analysis was performed by Robertson Microlit Laboratories, Inc., in Madison, New Jersey. Gas chromatographic (GC) analyses were performed using an Agilent 7890A GC equipped with an Agilent 7683B autosampler, a flame ionization detector (FID), and a J&W Scientific 19091J-413 column (length = 30 m, inner diameter = 320  $\mu\text{m}$ , and film thickness = 250  $\mu\text{m}$ ). The temperature program for GC analysis held the temperature constant at 80  $^\circ\text{C}$  for 1 min, heated samples from 80 to 200  $^\circ\text{C}$  at 20  $^\circ\text{C}/\text{min}$  and held at 200  $^\circ\text{C}$  for 1 min. Inlet and detector temperatures were set constant at 220 and 250  $^\circ\text{C}$ , respectively. Cyclooctane was used as an internal standard to calculate reaction conversion and yield. Gas chromatography-mass spectrometry (GC/MS) analyses were performed using a Hewlett Packard HP 6890 Series Gas Chromatograph, a Hewlett Packard HP 5973 Mass Spectrometer Detector (MSD), and a J&W Scientific DB\*-5 Column (length = 30 m, inner diameter = 0.325 mm, film thickness = 1.0  $\mu\text{m}$ , catalog number 123-5033). The temperature program for the analyses held the temperature constant at 50  $^\circ\text{C}$  for 3 min, heated samples from 50 to 80  $^\circ\text{C}$  at 30  $^\circ\text{C}/\text{min}$ , holding at 80  $^\circ\text{C}$  for 2 min, then

heating samples from 80 to 200 °C at 17 °C/min, and holding at 200 °C for 1.94 min. The MSD temperature was held at 300 °C for 15 min.

**Channel packing:** A 60 cm section of tubing (Swagelok PFA Tubing, 1/8" outer diameter) was attached to a Swagelok PFA union packed with glass wool. A separate union (not packed with glass wool) was attached to the inlet side of the 60 cm column. Two 10 cm sections of tubing were attached to the channel, serving as the outlet. A 1/16" female Luer was attached to the inlet. Functionalized resin was suspended in CH<sub>2</sub>Cl<sub>2</sub> and the column slurry packed using a syringe.

**Residence time determination:** Three columns (10 cm, 30 cm, and 60 cm) were packed with AO resin. A dye solution was prepared by dissolving 15 mg of Disperse Red 1 in 20 mL CH<sub>2</sub>Cl<sub>2</sub>. A 5 mL syringe was filled with the dye and passed through the channel. Using a flow rate of 2.0 mL/min, the residence time was determined for all three packed columns. The residence time was measured from initial appearance of the dye on the column to the appearance of a pink hue at the outlet of the channel. This was repeated in triplicate for all three column lengths and residence time increased linearly with channel length. Between trials, the channel was rinsed with 3 mL of CH<sub>2</sub>Cl<sub>2</sub>.

| Column length (cm) | Average residence time (s) | St. dev. |
|--------------------|----------------------------|----------|
| 60                 | 13.82                      | 0.33     |
| 30                 | 5.90                       | 0.35     |
| 10                 | 1.75                       | 0.13     |

A second set of experiments was conducted to determine the relationship between the flow rate and residence time. A 30 cm column was packed with 137 mg of AO. The residence times were measured using the above procedure.

| Flow rate (mL/min) | Average residence time (s) | St. dev. |
|--------------------|----------------------------|----------|
| 3.90               | 2.60                       | 0.05     |
| 2.00               | 5.05                       | 0.45     |
| 1.00               | 11.20                      | 0.68     |
| 0.40               | 30.56                      | 0.99     |
| 0.20               | 68.20                      | 1.73     |
| 0.10               | 141.70                     | 2.83     |

| Aqueous flow rate ( $\mu\text{L min}^{-1}$ ) | Organic flow rate ( $\mu\text{L min}^{-1}$ ) | Approx. residence time (s) |
|----------------------------------------------|----------------------------------------------|----------------------------|
| 224                                          | 176                                          | 62                         |
| 112                                          | 88                                           | 134                        |
| 56                                           | 44                                           | 288                        |

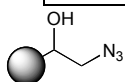

**Azide modified AMBERZYME® Oxirane (AO-N<sub>3</sub>, 2):** Sodium azide (5.26 g, 81 mmol, 8.1 equiv) and ammonium chloride (2.27 g, 42.4 mmol, 4.2 equiv) were dissolved in 500 mL 90:10 v/v water in methanol. AMBERZYME® Oxirane (10.0 g, 1.0 mmol epoxide/g resin, 10.0 mmol, 1.0 equiv) was suspended in the azide solution and the reaction mixture refluxed overnight with gentle stirring. The resin was filtered using a Buchner funnel, washed with deionized H<sub>2</sub>O (2x 50 mL), MeOH (2x 50 mL), Et<sub>2</sub>O (1x 25 mL), and dried under vacuum. Elemental analysis afforded a loading of 1.0 mmol N<sub>3</sub>/g resin.

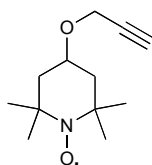

**Propargyl ether TEMPO 5:** Sodium hydride (150 mg, 6.3 mmol, 1.1 equiv) was added to DMF (10 mL) and stirred at RT. 4-hydroxy-TEMPO (1.02 g, 5.9 mmol, 1.0 equiv) in DMF (10 mL) was added drop wise to the sodium hydride suspension at 0 °C and stirred until gas evolution ceased. Propargyl bromide (80% in toluene, 800  $\mu$ L, 7.4 mmol, 1.3 equiv) in DMF (10 mL) was added at 0 °C and the reaction was allowed to warm up to RT and stirred overnight. The reaction was quenched with water and the aqueous phase was extracted with ethyl acetate (3x 50 mL) and the combined organic extracts dried over  $\text{MgSO}_4$ , concentrated and dried under vacuum. The product was purified using column chromatography (silica gel, 1:1  $\rightarrow$  1:2 hexanes/ethyl acetate,  $R_f$  = 0.40) to yield a dark orange solid (841 mg, 68%).  $\delta_c$  (75 MHz,  $\text{CDCl}_3$ ): 20.619, 32.199, 44.530, 55.298, 59.198, 69.905, 74.238; MS  $m/z$  210 ( $\text{M}^+$ ). To obtain NMR spectra, a few drops of phenylhydrazine were added to the NMR tube to reduce the product to the corresponding hydroxylamine.

## AT-IR compound 5

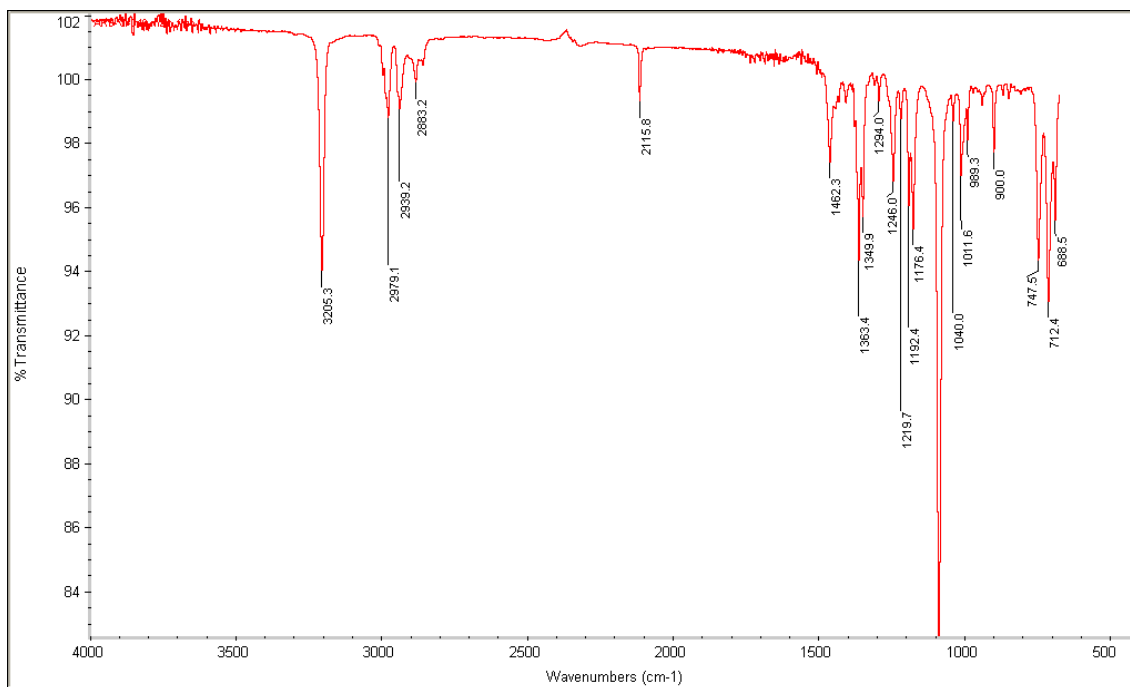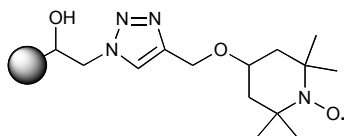

**AO-TEMPO 6: 5** (450 mg, 2.14 mmol, 1.3 equiv) and CuI (40 mg, 0.2 mmol, 0.13 equiv) were dissolved in anhydrous THF (20 mL). **2** (1.64 g, 1.0 mmol N<sub>3</sub>/g resin, 1.64 mmol, 1.0 equiv) was added to the solution and placed under a N<sub>2</sub> atmosphere. The suspension was shaken for 3 d. The resin was washed with THF (2x 10 mL), MeOH (1x 10 mL), 1 M HCl (2x 10 mL), deionized H<sub>2</sub>O (1x 10 mL), sat. NaHCO<sub>3</sub> (2x 10 mL), deionized H<sub>2</sub>O (1x 10 mL), MeOH (1x 10 mL) and CH<sub>2</sub>Cl<sub>2</sub> (1x 10 mL), and dried under vacuum to yield the white AO-TEMPO resin (1.81 g, 0.46 mmol TEMPO/g resin). The loading was calculated by mass difference.

**Representative primary alcohol flow oxidation procedure:** Benzyl alcohol (0.2 M) and cyclooctane (0.02 M) in  $\text{CH}_2\text{Cl}_2$  or EtOAc was placed in a syringe and placed on a syringe pump set to  $44 \mu\text{L min}^{-1}$  ( $8.8 \mu\text{mol alcohol min}^{-1}$ , 1.0 equiv  $\text{min}^{-1}$ ). Aqueous NaOCl (purchased from Sigma Aldrich and diluted to 0.25 M), adjusted to pH 9.1 with  $\text{NaHCO}_3$ , mixed with aqueous KBr (0.5 M, 30  $\mu\text{L}$  per mL NaOCl) were placed in a separate syringe and placed on another syringe pump set to  $56 \mu\text{L min}^{-1}$  (1.5 equiv NaOCl  $\text{min}^{-1}$ , 0.10 equiv KBr  $\text{min}^{-1}$ ). The phases combined at a Y-junction and passed through a 60 cm channel packed with AO-TEMPO (300 mg) submerged in an ice bath. The reaction mixture was collected in a 4 mL screw cap vial until the sample had eluted through the channel. Upon completion of each experiment, the organic phase was separated from the aqueous phase using a pipette and transferred to a separate 4 mL screw cap vial. After each trial, the channel was washed with 5 mL deionized  $\text{H}_2\text{O}$ , 5 mL MeOH, and 5 mL  $\text{CH}_2\text{Cl}_2$ . The column was flushed with air prior to each run. Samples were analyzed by GC and conversions and yields obtained by comparing starting material and product to an internal standard.

**Representative secondary alcohol flow oxidation procedure:** 1-phenylethanol (0.1 M) and cyclooctane (0.01 M) in  $\text{CH}_2\text{Cl}_2$  was placed in a syringe and placed on a syringe pump set to  $44 \mu\text{L min}^{-1}$  ( $4.4 \mu\text{mol alcohol min}^{-1}$ , 1.0 equiv  $\text{min}^{-1}$ ). Aqueous NaOCl (purchased from Sigma Aldrich and diluted to 0.25 M), adjusted to pH 9.1 with  $\text{NaHCO}_3$ , mixed with aqueous KBr (0.5 M, 30  $\mu\text{L}$  per mL NaOCl) were placed in a separate syringe and placed on another syringe

pump set to  $56 \mu\text{L min}^{-1}$  ( $3.0 \text{ equiv NaOCl min}^{-1}$ ,  $0.20 \text{ equiv KBr min}^{-1}$ ). The phases combined at a Y-junction and passed through a 60 cm channel packed with AO-TEMPO (300 mg) submerged in an ice bath. The reaction mixture was collected in a 4 mL screw cap vial until the sample had eluted through the channel. Upon completion of each experiment, the organic phase was separated from the aqueous phase using a pipette and transferred to a separate 4 mL screw cap vial. After each trial, the channel was washed with 5 mL deionized  $\text{H}_2\text{O}$ , 5 mL MeOH, and 5 mL  $\text{CH}_2\text{Cl}_2$ . The column was flushed with air prior to each run. Samples were analyzed by GC and conversions and yields obtained by comparing starting material and product to an internal standard.

**Bleach titration:** Sodium hypochlorite solution (Sigma Aldrich, reagent grade, 500  $\mu\text{L}$ ) was diluted to 100 mL with deionized  $\text{H}_2\text{O}$  in an Erlenmeyer flask equipped with a stir bar. Excess KI and excess  $\text{H}_2\text{SO}_4$  (conc.) were added to the flask, yielding a dark burgundy solution. Sodium thiosulfate pentahydrate (1.0 M in deionized  $\text{H}_2\text{O}$ ) was added drop wise to the flask until the color of the solution dissipated (the equivalence point). The concentration of NaOCl in the solution was calculated using the following reactions.

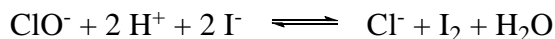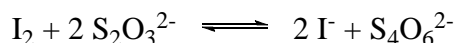



$$\text{M NaOCl} = \frac{0.5 \times \text{mmol Na}_2\text{S}_2\text{O}_3}{0.5 \text{ mL NaOCl solution}}$$

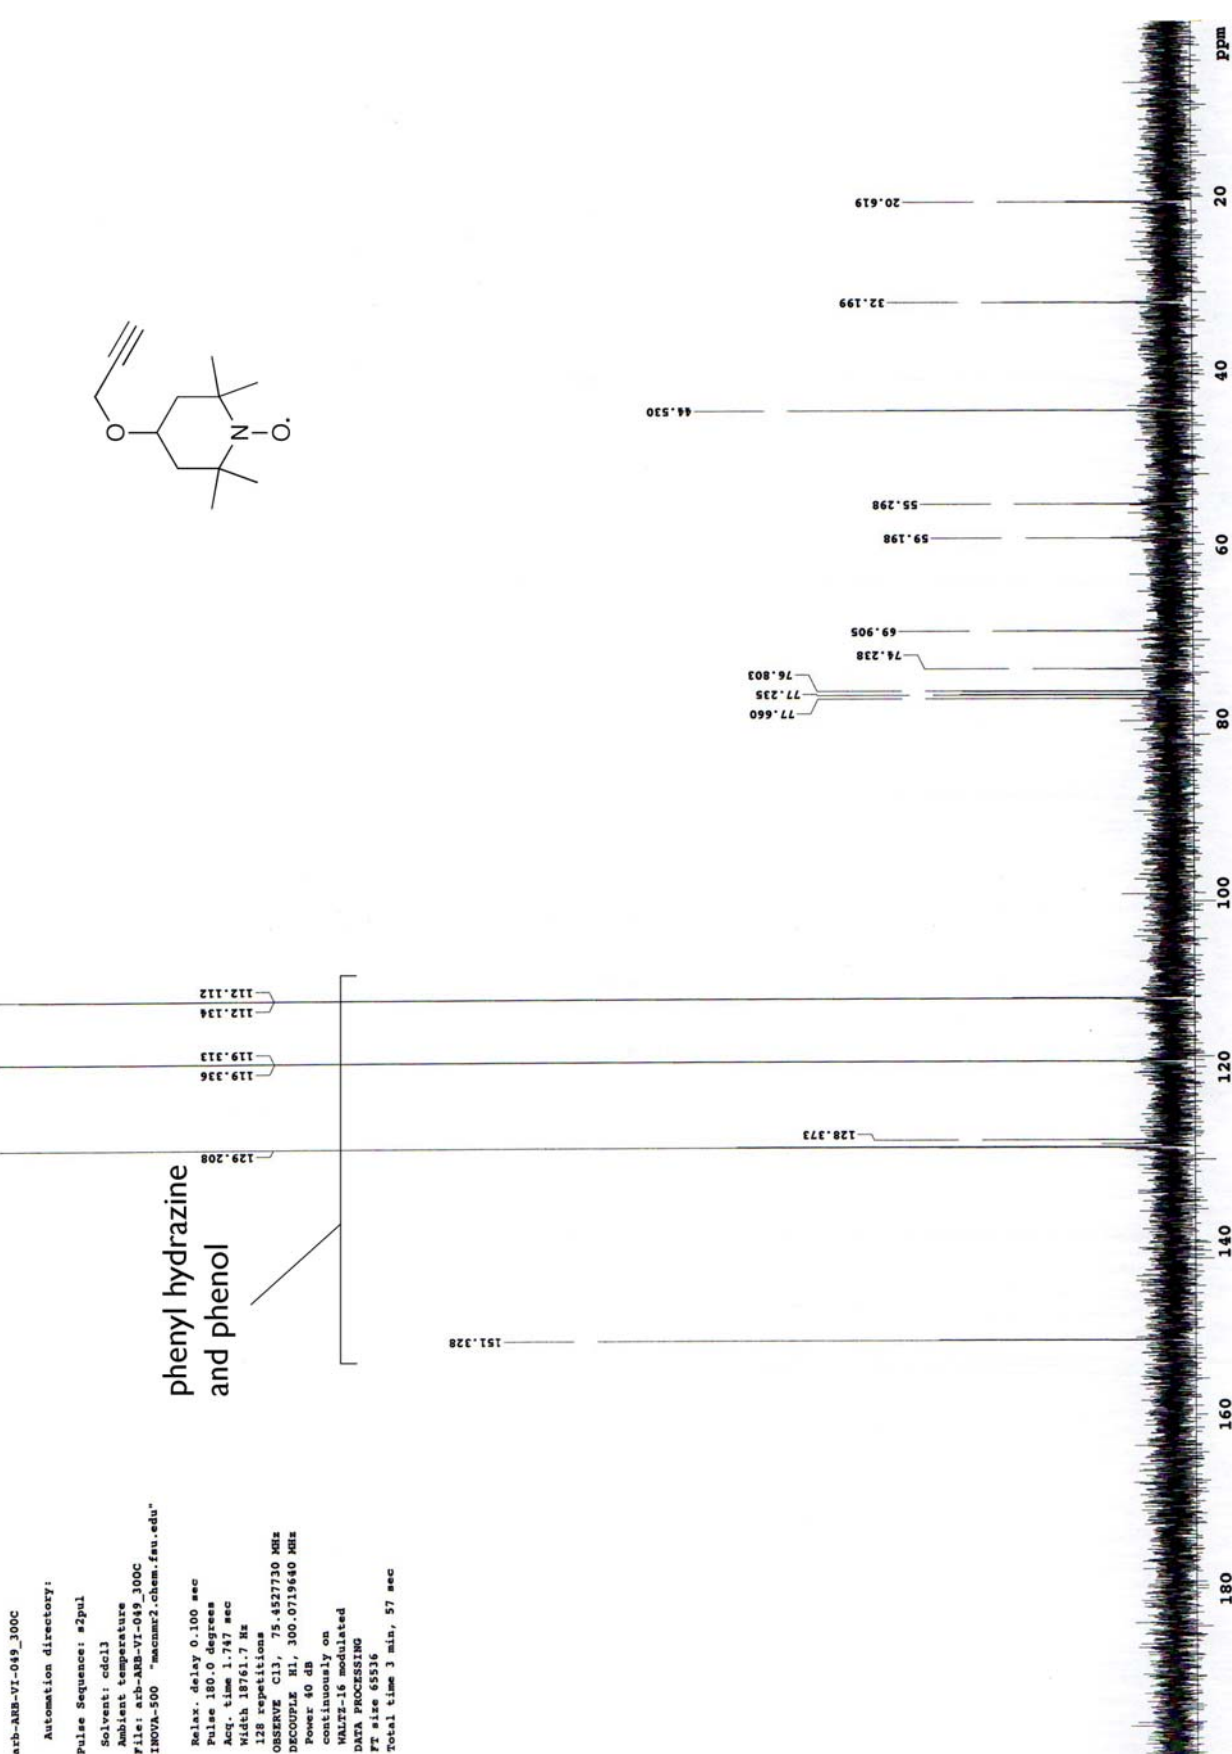

AMB-VI-212\_300H

Automation directory:

Pulse Sequence: s2pul

Solvent: cdcl3

Acquisition temperature

File: srb-AMB-VI-212\_300H

180VX-500 "mccnm2.chm.fau.edu"

Relax. delay 1.000 sec

Pulse 21.500 sec

Acq. time 1.666 sec

Width 4909.2 Hz

16 repetitions

OBSERVE N1, 300.0704275 MHz

DATA PROCESSING

FT size 16384

Total time 0 min, 42 sec

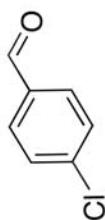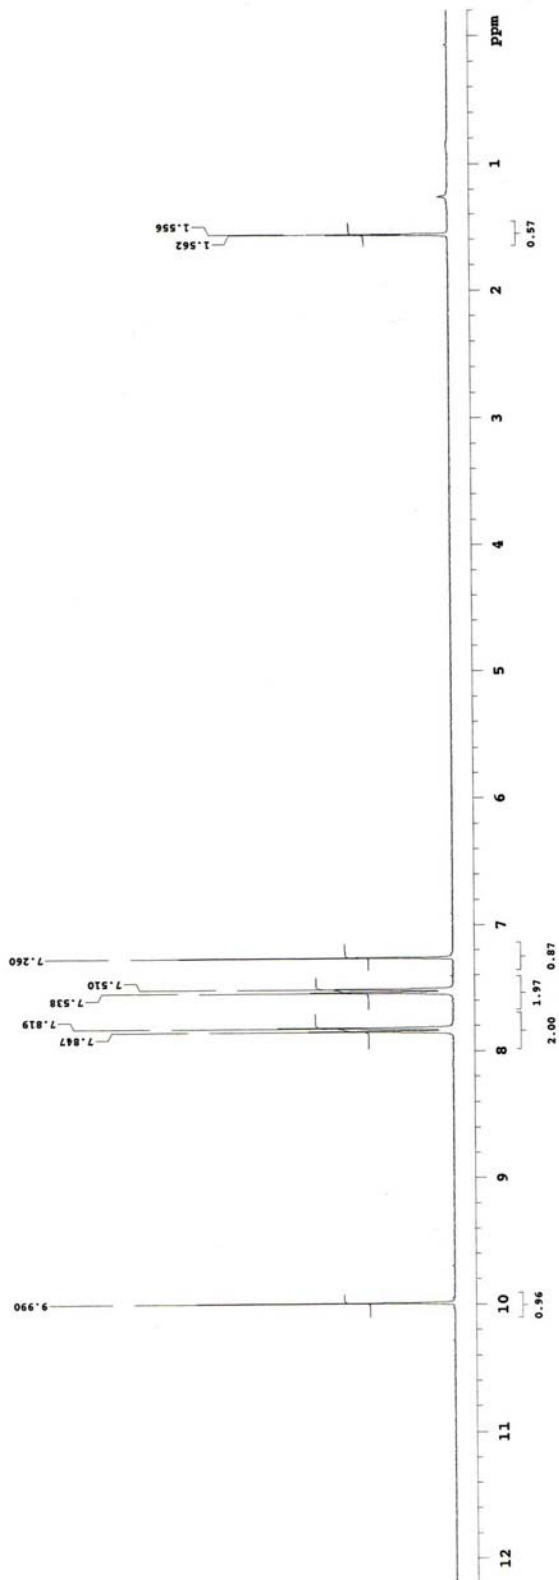

Supplement: Additional file 1 [file 1860-5397-5-17-S1.pdf]
